## Using set theory to reduce redundancy in pathway sets

Ruth Stoney<sup>1\*</sup>, Jean-Marc Schwartz<sup>2</sup>, David L Robertson<sup>3</sup>, Goran Nenadic<sup>1</sup>

<sup>1</sup>School of Computer Science, University of Manchester, M13 9PT, UK

<sup>2</sup>Faculty of Biology, Medicine and Health, University of Manchester, M13 9PT, UK

<sup>3</sup>MRC-University of Glasgow Centre for Virus Research, Garscube Campus, Glasgow, G61 1QH, UK.

Ruth Stoney: [ruth.stoney@manchester.ac.uk](mailto:ruth.stoney@manchester.ac.uk)

David L Robertson: [David.L.Robertson@glasgow.ac.uk](mailto:David.L.Robertson@glasgow.ac.uk)

Goran Nenadic: [g.nenadic@manchester.ac.uk](mailto:g.nenadic@manchester.ac.uk)

Jean-Marc-Schwartz: [jean-marc.schwartz@manchester.ac.uk](mailto:jean-marc.schwartz@manchester.ac.uk)

This work has been supported by the Biotechnology and Biological Sciences Research Council DTP [BB/J014478/1].

\* corresponding author

# 1. Abstract

## 1.01 Background

The consolidation of pathway databases, such as KEGG[1], Reactome[2] and ConsensusPathDB[3], has generated widespread biological interest, however the issue of pathway redundancy impedes the use of these consolidated datasets. Attempts to reduce this redundancy have focused on visualizing pathway overlap or merging pathways, but the resulting pathways may be of heterogeneous sizes and cover multiple biological functions. Efforts have also been made to deal with redundancy in pathway data by consolidating enriched pathways into a number of clusters or concepts. We present an alternative approach, which generates pathway subsets capable of covering all of genes presented within either pathway databases or enrichment results, generating substantial reductions in redundancy.

## 1.02 Results

We propose a method that uses set cover to reduce pathway redundancy, without merging pathways. The proposed approach considers three objectives: removal of pathway redundancy, controlling pathway size and coverage of the gene set. By applying set cover to the ConsensusPathDB dataset we were able to produce a reduced set of pathways, representing 100% of the genes in the original data set with 74% less redundancy, or 95% of the genes with 88% less redundancy. We also developed an algorithm to simplify enrichment data and applied it to a set of enriched osteoarthritis pathways, revealing that within the top ten pathways, five were redundant subsets of more enriched pathways. Applying set cover to the enrichment results removed these redundant pathways allowing more informative pathways to take their place.

## 1.03 Conclusion

Our method provides an alternative approach for handling pathway redundancy, while ensuring that the pathways are of homogeneous size and gene coverage is maximised. Pathways are not altered from their original form, allowing biological knowledge regarding the data set to be directly applicable. We demonstrate the ability of the algorithms to prioritise redundancy reduction, pathway size control or gene set coverage. The application of set cover to pathway enrichment results produces an optimised summary of the pathways that best represent the differentially regulated gene set.

## Keywords

Set cover, data redundancy, pathways, gene enrichment analysis

40

## 41 2. Background

42 Pathways are sets of genes corresponding to functionally related interacting  
43 proteins. Pathway data is available from many databases dependent on biological  
44 focus. The fragmented nature of pathways across multiple databases makes it  
45 difficult to perform inclusive analysis of all known data. To address this issue,  
46 many attempts have been made to consolidate pathway databases such as  
47 ConsensusPathDB (CPDB) [4], PathwayCommons [5], The Human Pathway  
48 Database (HPD) [6], Pathway Interaction Database (PID) [7], and NCBI Biosystems  
49 [8]. Amalgamating multiple databases into a consistent searchable format  
50 facilitates the use of these resources, however the arbitrary nature of pathway  
51 boundaries results in overlap and redundancy. This redundancy greatly increases  
52 the quantity and complexity of pathway data, which has led to the development of  
53 a range of tools to assist in data simplification and interpretation [6, 7, 9–11].  
54 Previous solutions presented to deal with redundancy include visualizing  
55 redundancy between pathways to the user [6], merging pathways based on  
56 similarity [10, 11] and even integrating full pathway sets into a non-redundant,  
57 single unified pathway [12]. Reducing redundancy simplifies the pathway-related  
58 descriptive space, allowing multiple resources to be combined while limiting the  
59 number of pathway attributes assigned to each gene. The advantages are apparent,  
60 with resources such as PathCards being integrated into the widely used  
61 GeneCards[11].

62  
63 Redundancy Control in Pathway Databases (ReCiPa) [10] uses a pathway merging  
64 algorithm to combine pathways with high levels of overlap. Users select a  
65 maximum overlap threshold and pathway pairs displaying greater levels of  
66 overlap are merged. Within that study redundancy was observed within five large  
67 databases (KEGG, Biocarta, CGP, NCI-PID, and Reactome). They proceeded to  
68 merge pathways from the Molecular Signatures Database (MSigDB), whose overlap  
69 exceeded 75%, reducing pathway redundancy.

70  
71 Pathcards described a multistep procedure to reduce pathway redundancy, also  
72 through pathway merging [11]. Two thresholds were calculated and sequential  
73 merging steps were used to minimize overlap, while preventing the generated  
74 super-pathways from becoming too large to be informative. By merging pathways  
75 into super-pathways, Pathcards suggested many new molecular interactions. They  
76 demonstrated that many of these newly generated interactions are supported by  
77 high numbers of literature co-mentions and high experimental interactions scores  
78 according to STRING. However, while the generation of potential interactions can  
79 be highly beneficial, if the aim is to utilize previously validated data, merging  
80 pathways introduces a source of uncertainty into the dataset.

81  
82 A major application of pathway data sets is pathway enrichment analysis. Both  
83 Pathcards and ReCiPa explored the capability of their reduced pathway dataset to

84 improve enrichment results. Enrichment analysis of 830 differential expression  
85 sets was performed using the super-pathways generated within Pathcards. The  
86 enrichment results from super-pathways tended to be more significant than the  
87 enrichment scores of their constituent pathways. Similarly within the ReCiPa study  
88 enrichment analysis was performed using genes differentially expressed in  
89 obesity. After merging, the top 20 most significantly enriched pathways showed  
90 less overlap and greater significance towards the disease, compared to the original  
91 dataset.

92  
93 Pathway Distiller implemented an alternative approach by removing redundancy  
94 from enriched pathway sets following enrichment analysis [9]. Pathways may be  
95 consolidated into pathway concepts based on gene expression profiles, gene  
96 membership, protein-protein interaction data or shared Gene Ontology (GO)  
97 terms. Each method provides varying, complementary views of the data, with  
98 different pathway concepts generated. Consolidating enrichment output into a  
99 reduced number of pathway concepts increases data manageability and  
100 readability, by organizing redundant pathways into their major groups.

101  
102 All of the approaches discussed to this point have used merging and consolidation  
103 to address redundancy. Alexa et al. (2006) demonstrated that redundancy in GO  
104 enrichment results could be reduced by selecting a subset of representative terms  
105 [13]. Pathway enrichment analysis and GO enrichment analysis are similar  
106 techniques in which sets of differentially expressed genes are compared to gene  
107 sets associated with pathways or GO terms. Alexa et al. (2006) introduced two  
108 algorithms, *elim* and *weight*, which use the Gene Ontology topology to select a  
109 representative subset of highly enriched GO terms [13]. The enrichment set cover  
110 algorithm presented in this paper shares some conceptual similarity with this  
111 approach however, the implementation is different since there is no organized  
112 topological hierarchy for combined pathway datasets and the rules governing the  
113 Gene Ontology, such as the true path rule [14], do not apply.

114  
115 Within this paper we show that set cover can be used to reducing redundancy by  
116 selecting subsets of representative pathways. We describe a set of algorithms for  
117 reducing redundancy in pathway datasets, as well as a separate algorithm for  
118 reducing redundancy from pathway enrichment results. The proportional set  
119 cover algorithm and hitting set cover algorithm aim to identify a minimum subset  
120 of pathways required to cover the genes in highly redundant, consolidated  
121 pathway databases. The generated set covers are not designed to depict the full  
122 range of possible pathway boundaries and their accompanying cellular functions,  
123 but rather they provide a simplified set of pathways to represent the actions of  
124 genes within the dataset. Since the pathways are not merged database and  
125 biological information remains directly applicable and functional specificity is not  
126 lost through pathway size expansion. The proposed method also removes the risk  
127 of biologically distinct pathways being merged. The algorithm's ability to remove  
128 overlap is not limited by thresholds, conferring an advantage compared to  
129 approaches such as Pathcards and ReCiPa in which redundancy between pathway

130 pairs can only be removed if the overlap exceeds the threshold. Set cover  
131 algorithms also consider redundancy between multiple pathways, rather than just  
132 comparing pathway pairs.

133

134 We also developed the enrichment set cover algorithm for handling pathway  
135 enrichment data and applied it to a set of enriched osteoarthritis pathways [15]. In  
136 contrast to the approaches used by ReCiPa and Pathcards, the enrichment set  
137 cover algorithm is designed to be used following enrichment analysis, which  
138 should be performed using the full pathway dataset. Redundancy is then removed  
139 from the enriched pathway set by selecting the pathway with the lowest p-value to  
140 cover each differentially regulated gene. Enriched pathways are not merged or  
141 altered and the number of enriched pathways required to cover the dataset is  
142 reduced. The resulting pathways set can therefore be used as an optimized  
143 summary output, conveniently showing the most important pathways for  
144 describing the differentially regulated gene set. By increasing the number of  
145 differentially regulated genes covered by the most highly enriched pathways,  
146 researchers examining the top 10 or 20 pathways are provided with a more  
147 inclusive portrayal of the gene set.

148

### 149 3. Approach

150 We downloaded pathway data from ConsensusPathDB (CPDB), an opensource  
151 online collection of pathways, that incorporates 32 sources including KEGG,  
152 Wikipathways, PDB, Reactome. CPDB makes these resources available as a single  
153 download, which we acquired on 24/09/2015 containing 4,011 pathways. We  
154 applied the set cover algorithm to the CPDB data set, analyzing it's effectiveness at:  
155 reducing pathway overlap; reducing pathway size variability; and preserving the  
156 maximum number of genes in the data set. We found that standard set cover  
157 caused unacceptable increases in pathway size, therefore we modified the  
158 algorithm and assessed the modified algorithms capability to meet the previous  
159 three objectives.

160

161 Set cover is a well-defined algorithm in computer science for handling overlapping  
162 sets of sets. For example, set cover is used by CLASS, a bioinformatics program that  
163 maps RNA sequence data to transcripts [16]. Set cover has also been used to  
164 predict protein-protein interactions based on binding domains [17], to reduce the  
165 complexity of SNP sets [18] and to minimize the number of probes needed to  
166 analyze DNA [19].

167

168 Set cover algorithms deal with elements and sets, which relate to genes and  
169 pathways respectively. All the unique genes in the data set are collectively referred  
170 to as the universe. The aim is to produce a reduced selection of sets (pathways),  
171 which collectively cover all the elements (genes) in the universe (dataset). This

172 subset of the original data is called the cover set [20]. Each time a pathway is  
173 added to the cover set the genes in the pathway become covered (Figure 1). Direct  
174 application of set cover lead to extremely large, functionally non-specific pathways  
175 dominating the cover set, therefore we implemented the proportional set cover  
176 and hitting set cover algorithms to better control pathway size, while reducing  
177 redundancy and covering the dataset.

178

179 When dealing with enrichment analysis data the aim is to reduce redundancy  
180 between pathways, while preserving the order of enrichment significance denoted  
181 by the p-values. We designed an algorithm that would select the set of pathways  
182 with the lowest p-values capable of covering all the genes in the dataset. This  
183 ensures that the filtered results return the most enriched pathways available for  
184 each gene.

185

## 186 4. Methods

### 187 4.01 **Overlap score**

188 To measure overlap across different algorithms we measured the mean number of  
189 pathways that each gene appears in. Within the raw data genes appeared in a  
190 mean of 12.4 pathways. We refer to this metric as the overlap score.

### 191 4.02 **Set cover**

192 We applied the set cover algorithm to the data set, which generates a subset of  
193 pathways called a cover set, in which all the genes in the data set are represented  
194 or "covered". Set cover begins by first assigning values to each pathway ( $v_i$ ). The  
195 set cover values correspond to the number of uncovered genes each pathway  
196 contains (Equation 1).

197

$$v_i = |s_i \cap \mathbf{R}|$$

198

199 where ( $s_i$ ) is the pathway's gene set and  $\mathbf{R}$  is the set of all uncovered genes.

200

201 At the beginning of the algorithm all the genes in the dataset are uncovered so the  
202 algorithm selects the largest pathway. The genes from the selected pathway are  
203 then covered, so it is unnecessary to cover them again using additional pathways.  
204 The algorithm then recalculates how many uncovered genes each pathway  
205 contains and continues to add the pathway with the maximum value to the set  
206 cover until all genes in the data set are covered.

207

208

209 *Algorithm 1 Set cover (in separate file)*



210 where  $R$  is the set of uncovered genes,  $U$  is all the genes in the dataset,  $C$  is the  
211 covered genes,  $SC$  is the set cover result,  $GC$  is the gene coverage (see Section 4.03)  
212 and  $s_i$  is a pathway.

213

214 Application of the set cover algorithm was effective in reducing overlap between  
215 the pathways; however, it selected very large pathways with reduced  
216 informativeness (maximum size 2320, standard deviation 160, almost double the  
217 standard deviation on the original dataset 86.9). We therefore explored methods  
218 that avoid preferential selection of large pathways.

219

#### 220 4.03 Gene Set Coverage

221 As the set cover algorithm approaches completion and the final sets are added to  
222 the cover set, increases in data coverage are gained at the expense of redundancy  
223 reduction. This is because the final sets required to cover the few remaining genes  
224 tend to have the most overlap with other pathways already in the set cover. In  
225 addition, fewer pathways are available to cover the final few genes, restricting  
226 options to control pathway size. To allow a user-defined compromise between the  
227 gene coverage, pathway redundancy and pathway size we introduce the Gene  
228 Coverage ( $GC$ ) parameter. Setting  $GC$  below 100% allows the algorithm to finish  
229 before the final elements have been covered. We experimented setting  $GC$  to 90,  
230 95, 99 and 100% of the number of genes in the data set.

231

#### 232 4.04 Proportional set cover

233 When reducing pathway redundancy there are three competing aims: reducing  
234 redundancy; controlling pathway size; and covering the entire gene set. The  
235 proportional set cover algorithm was generated to focus on controlling pathway  
236 size.

237

238 To control the size of the pathways we altered the scoring mechanism to rank  
239 pathways based on the proportion of uncovered genes they contained, rather than  
240 the absolute number (Equation 2). This works because larger pathways are more  
241 likely to have a proportion of their genes covered when other pathways are  
242 selected. Additionally this mechanism directly penalizes overlap, which the  
243 standard algorithm does not. At the beginning of the proportional set cover  
244 algorithm none of the genes are covered so the proportion of uncovered genes in  
245 every pathway is 1. This would result in the starting pathway being selected at  
246 random. To ensure that pathway size variability is controlled as strictly as  
247 possible, we implemented the second part of Equation 2, which ensures that  
248 pathways of mean pathway size are preferentially selected when multiple  
249 pathways with the same proportion of uncovered genes are available.

250

$$v_i = \frac{|s_i \cap R|}{|s_i|} + \frac{1}{\text{abs}(|s_i| - \overline{|s_i|}) * k}$$

251

252 where  $s_i$  is the pathway's gene set,  $\overline{|s_i|}$  is the mean pathway length,  $R$  is the  
253 uncovered genes set and  $k$  is a large constant to limit the influence of the second  
254 term (taken equal to 10,000).

255

#### 256 4.05 Hitting set cover

257 The set-covering problem can be reformulated into the equivalent set-hitting  
258 problem. In this formulation genes and pathways are visualized as bi-partite graph  
259 in which the pathways are connected to the genes that they contain. In this  
260 depiction it is clear that some genes are only linked to a single pathway, which  
261 must be selected if the gene is to be covered. The importance of pathways can  
262 therefore be considered as a factor of how infrequent their genes are. The hitting  
263 set cover is therefore designed to reduce redundancy as much as possible without  
264 directly selecting for pathway size.

265

266 We calculated the frequency of each gene in the data set ( $F$ ), then assigned the  
267 gene's value  $gv(j)$  as  $1/F$ . We then assigned a value  $v_i$  to each pathway defined as  
268 the sum of each uncovered gene's scores divided by the number of genes in the  
269 pathway (Equation 3).

270

$$gv(j) = 1 / F(j)$$
$$v_i = \frac{\sum_{j \in s_i \cap R} gv(j)}{|s_i|}$$

271

272 where  $gv(j)$  is the value of a gene,  $F(j)$  is the number of pathways a gene is in,  
273  $j \in s_i \cap R$  means for each uncovered gene in the pathway and  $|s_i|$  is the length of  
274 the pathway.

275

#### 276 4.06 Set cover for pathway enrichment analysis

277 Pathway analysis is a frequently used method; therefore a modified set cover  
278 algorithm to address this situation could be highly useful. The universe represents  
279 differentially expressed genes and the sets are enriched pathways generated  
280 through enrichment analysis. Enrichment analysis results represent entirely  
281 different input data compared to the pathway datasets used in the previous  
282 algorithms, as the enriched pathways already have scores (p-values). We wish to  
283 reduce redundancy (gene overlap) between enriched pathways and it is essential  
284 that the pathways with the lowest possible p-values are selected. Equation 4  
285 allows the pathways with the lowest p-values to be selected, unless all of their  
286 genes are covered by other enriched pathways with even lower p-values.



287

$$s_i \cap R = \theta \rightarrow b = 0, \quad s_i \cap R \neq \theta \rightarrow b = 1 \\ v_i = (1 - pvalue_i) * b$$

288

289 where  $s_i$  is the enriched pathway's gene set,  $R$  is the uncovered gene set,  $b$  is a  
290 binomial operator,  $pvalue_i$  is the pathway's p-value and  $v_i$  is the pathway's set  
291 cover value.

292 We generated the enriched data set by applying GOseq [21] to expression data  
293 from the damaged cartilage in osteoarthritis patients and controls [15].

294

## 295 5. Results

296 We started with the large, extensively redundant CPDB data set and used set cover  
297 to reduce pathway overlap, while controlling pathway size and seeking to cover as  
298 much of the data set as possible. We describe the ability of the standard set cover  
299 algorithm and two modified algorithms, in conjunction with the  $GC$  parameter, to  
300 meet these objectives.

301

### 302 5.01 Pathway redundancy varies between different algorithms

303 The original pathway data set contained 11,196 genes and 3,305 pathways; the  
304 starting overlap score (see methods) was 12.4. The standard set cover algorithm  
305 reduced overall redundancy from 12.4 to 4.1, a 73% reduction (since a completely  
306 discrete pathway set would have a score of 1). The overlap score for proportional  
307 set cover was 4.36, slightly higher than the standard set cover algorithm, but still  
308 representing a 70% reduction in overlap from the original data. The hitting set  
309 cover algorithm was designed to select pathways that contained rare genes within  
310 the data set, resulting in the greatest reduction in overlap (overlap score of 3.95  
311 equivalent to a 74% reduction).

312

313 After application of the set cover algorithms the distribution of the remaining  
314 overlap between pathways varied greatly. Figure 2 shows the Jaccard similarity  
315 between pairs of pathways, in the outputs produced by each of the three  
316 algorithms. The standard set cover algorithm produced the lowest maximum  
317 overlap (Jaccard similarity = 0.68) between the pathway pairs. However, compared  
318 to the original data, a higher proportion of pathway pairs in the set cover output  
319 showed Jaccard similarities between 10-30%. Proportional set cover had the  
320 greatest maximum Jaccard similarity at 0.93, out of the set cover algorithms. The  
321 hitting set cover algorithm produced a maximum Jaccard similarity between two  
322 pathways of 0.82, despite having the lowest overlap score.

323

324 **Gene Coverage can be lowered to reduce redundancy**

325 For each of the algorithms it is possible to use the *GC* parameter to prioritize  
326 reductions in redundancy over gene coverage by stopping any algorithm before all  
327 of the genes in the dataset have been covered. Figure 3 shows improved ability of  
328 the set cover algorithms to reduce pathway overlap for different values of *GC*. If  
329 99% of the genes are required then the hitting set algorithm achieves the lowest  
330 overlap score of 3.24, equivalent to an 80% reduction in overlap. Redundancy can  
331 be further reduced if only 95% of the genes are covered, with the proportional and  
332 hitting set algorithms producing an overlap score of 2.41, equivalent to a 88%  
333 reduction in redundancy. Both the proportional set cover and the hitting set cover  
334 are more effective at reducing redundancy than the standard set cover if *GC* is set  
335 to less than 100%.  
336

337 **Pathway size is affected by the set cover algorithm and Gene Coverage**  
338 **setting**

339 When *GC* was set to 100% the standard set cover algorithm represented all of the  
340 genes in the dataset using only 524 pathways (16% of the original pathway set).  
341 However, many of these were very large increasing the mean size to 87.2  
342 (standard deviation 160.1). These pathways have reduced informativeness since  
343 functional specificity is lost. Figure 4A illustrates the tendency of this algorithm to  
344 select extremely large pathways.  
345

346 The proportional set cover algorithm was designed to preferentially select  
347 moderately sized pathways. This returned a cover set of 1,336 pathways with  
348 controlled size variation (mean of 36.5, standard deviation 55.1) shown in Figure  
349 4A. The hitting set cover algorithm was less able to control pathway size than the  
350 proportional set cover algorithm, returning 957 pathways with a mean size of 46.2  
351 (standard deviation 61.7).  
352

353 Figures 4B – D show that as *GC* is reduced the tendency of the standard set cover to  
354 select very large pathways becomes more exaggerated. Decreasing *GC* also  
355 improves the ability of the proportional set cover algorithm to select moderately  
356 sized pathways. The hitting set algorithm also tends to select smaller pathways  
357 when *GC* is reduced, since larger pathways often contain more frequent genes.  
358 Reducing *GC* affects pathway size since in the later stages of the algorithm, fewer  
359 pathways are available to cover the remaining genes, reducing the available  
360 options. Therefore, lowering *GC* has the ability to help control pathway size when  
361 the proportional set cover and hitting set cover algorithms are used.  
362

363 *Since the databases that contribute to CPDB contain pathways of different sizes, the set cover generated may*  
364 *preferentially select pathways from some databases more than others.*

365 Table 1 shows the proportion of pathways that come from each database in the  
 366 cover set generated by each algorithm. All algorithms generate set covers with  
 367 reduced INOH and SMPDB pathways, showing that SMPBD's focus on small  
 368 molecules and INOH's ontology-based approach tend to be ill-suited to the  
 369 generation of discrete pathway protein sets. The standard set cover algorithm  
 370 generates sets containing large pathways, preferentially selecting pathways from  
 371 KEGG (median size 65, see Table 1) and Netpath (median size 51); while  
 372 proportional set cover tends to select smaller pathways from Reactome (median  
 373 size 17), HumanCyc (median size 5) and Signalink (median size 32), whilst  
 374 avoiding NetPath.  
 375

376 *Table 1. Proportion of pathways from CPDB databases. Median size represents the*  
 377 *median sizes of the pathways in the CPDB dataset. CPDB % represents the proportion*  
 378 *of the pathways in the unaltered dataset that came from each database. The*  
 379 *following columns represent the proportion of pathways in the set cover generated*  
 380 *by the standard set cover algorithm, the hitting set cover algorithm and the*  
 381 *proportional set cover algorithm. Different results are obtained by altering the*  
 382 *proportion of the gene set covered, shown in subcolumns below the algorithm header.*

383

|              | Median size | CPDB % | Standard set cover |      |      |      | Hitting set cover |      |      |
|--------------|-------------|--------|--------------------|------|------|------|-------------------|------|------|
|              |             |        | 100%               | 99%  | 95%  | 90%  | 100%              | 99%  | 95%  |
| BioCarta     | 15.0        | 6.3    | 6.3                | 4.6  | 0.5  | 0.0  | 4.7               | 4.8  | 5.4  |
| EHMN         | 32.5        | 1.6    | 3.2                | 3.4  | 2.6  | 1.0  | 2.1               | 2.3  | 1.8  |
| HumanCyc     | 5.0         | 8.2    | 6.5                | 7.7  | 2.6  | 0.0  | 10.1              | 10.9 | 12.9 |
| INOH         | 34.5        | 2.3    | 1.7                | 1.9  | 1.0  | 1.0  | 0.8               | 0.6  | 0.3  |
| KEGG         | 65.0        | 7.2    | 29.0               | 30.5 | 37.6 | 40.4 | 15.8              | 15.0 | 13.5 |
| NetPath      | 51.0        | 0.9    | 2.1                | 2.4  | 3.6  | 5.1  | 1.1               | 1.2  | 1.1  |
| PharmGKB     | 13.0        | 2.8    | 3.1                | 2.9  | 0.5  | 0.0  | 2.0               | 2.1  | 2.4  |
| PID          | 35.0        | 5.2    | 15.6               | 13.9 | 10.3 | 6.1  | 9.5               | 9.8  | 9.4  |
| Reactome     | 17.0        | 39.6   | 4.2                | 5.3  | 10.8 | 21.2 | 36.1              | 35.1 | 34.7 |
| Signalink    | 32.0        | 0.4    | 1.0                | 1.2  | 1.0  | 0.0  | 0.6               | 0.7  | 0.7  |
| SMPDB        | 11.0        | 16.7   | 1.7                | 1.4  | 0.5  | 0.0  | 1.6               | 1.5  | 1.4  |
| Wikipathways | 26.0        | 8.8    | 25.6               | 24.9 | 28.9 | 25.3 | 15.6              | 16.0 | 16.2 |

384

### 385 **Reducing redundancy in pathway enrichment analysis**

386 To demonstrate the ability of the set cover algorithm to handle enrichment data,  
 387 we applied the enrichment set cover algorithm to an osteoarthritis data set,  
 388 retrieved from Dunn et al. (2016) [15]. From the osteoarthritis data set, 58.3% of  
 389 the differentially expressed genes could be mapped to a CPDB pathway, which was

390 a 17% improvement on the G0seq [21] implemented data set. We retrieved 42  
391 enriched pathways with a p-value lower than 0.05, following the Benjamini-  
392 Hochberg correction for multiple testing. Set cover for enrichment analysis  
393 reduced the number of pathways required to cover the differentially expressed  
394 genes to 23 (supplementary table 1).

395

396 The heat map in Figure 5A shows the asymmetric overlap between the top ten  
397 pathways before application of the algorithm. The p-values from pathway  
398 enrichment determine the order in which pathways were considered for inclusion  
399 in the cover set. Pathways were omitted if all of the differentially expressed genes  
400 that they covered were also covered by more enriched pathways. Note that overlap  
401 tends to be higher in the bottom left triangle as pathways added later were often  
402 smaller subcomponents of larger pathways. We can see that 'extracellular matrix  
403 organization', the most enriched pathway, was placed in the cover set first. Next  
404 was 'collagen biosynthesis and modifying enzymes'; however, all of the  
405 differentially expressed genes in this pathway are also covered by the larger  
406 pathway 'extracellular matrix organization', as indicated by the red cell in the  
407 'collagen biosynthesis and modifying enzymes' row, 'extracellular matrix  
408 organization' column. The corresponding cell in the 'extracellular matrix  
409 organization' row reveals that 24% of the differentially expressed genes in  
410 'extracellular matrix organization' are also in 'collagen biosynthesis and modifying  
411 enzymes'.

412

413 Figure 5B shows overlap between the top ten pathways after application of the  
414 enrichment set cover algorithm. Because the differentially expressed genes  
415 covered by the 'collagen biosynthesis and modifying enzymes' pathway are a  
416 subset of those covered by the 'extracellular matrix organization' pathway, the  
417 'collagen biosynthesis and modifying enzymes' pathway is removed from the cover  
418 set (Figure 5B). The second pathway in this list therefore becomes 'GPCR signaling  
419 g alpha q'. The 'collagen formation' and 'class b 2 secretin family receptors'  
420 pathways are also removed because the differentially expressed genes they cover  
421 are additionally covered by the more enriched pathways 'extracellular matrix  
422 organization' and 'signal transduction' pathways (respectively). Additionally,  
423 'GPCR signaling pertussis toxin' and 'GPCR signaling cholera toxin' are absent from  
424 the returned list, as all of their differentially expressed genes are found in 'GPCR  
425 signaling g alpha q' or 'signal transduction'.

426

427 Some pathways in the enrichment set cover do still show high levels of overlap, for  
428 example 'wnt signalling network' is included despite 89% of its differentially  
429 expressed genes being covered by 'signal transduction'. This is acceptable because  
430 'signal transduction' is more highly enriched than 'wnt signalling network', yet the  
431 'wnt signalling network' is worth including as it contains three differentially  
432 expressed genes that are not in 'signal transduction'. If 'wnt signalling network'

433 had been excluded then these genes would not have been described by the most  
434 significant pathway available to represent them. The unmodified top ten enriched  
435 pathways only cover 78.0% of the enriched genes. Using the set cover enrichment  
436 algorithm increases this figure to 85.2% without disrupting the pathway order  
437 given by the enrichment p-values.  
438

## 439 6. Discussion and conclusion

440 We described algorithms suitable for reducing overlap in large pathway data sets  
441 allowing multiple databases to be amalgamated without excessive redundancy  
442 impeding the usefulness of the resource. Standard set cover is the best algorithm  
443 to reduce the number of pathways required to cover the data set, but significantly  
444 increases pathway size, which can be controlled by proportional set cover or  
445 hitting set cover. The proportional set cover is the best algorithm for controlling  
446 pathway size and the hitting set cover is the preferred choice for covering all of the  
447 genes in the dataset with minimal pathway redundancy. We showed that reducing  
448 the *GC* parameter allows further reductions in pathway redundancy; for example, if  
449 only 95% of the genes in the CPDB dataset were covered redundancy can be  
450 reduced by up to 88%. In addition reducing *GC* increases pathway size control  
451 when the proportional set cover and hitting set cover algorithms are used.  
452

453 For pathway enrichment analysis we aimed to reduce redundancy while selecting  
454 the most significantly enriched pathways based on p-values. As an application we  
455 used the modified set cover algorithm to reduce the results of enrichment analysis  
456 from a large osteoarthritis data set. We found that 5 out of the 10 top ranking  
457 pathways could be omitted as they were subsets of more highly enriched  
458 pathways. Overlap between pathways returned from enrichment data is not  
459 always immediately obvious and requires further consideration. By reducing this  
460 redundancy, data interpretation is made more intuitive. Reducing redundancy also  
461 allows the user to explore substantially more of the data set using the same  
462 number of pathways.  
463

464 The enrichment set cover algorithm presented within this study differs from  
465 existing methods implemented by ReCiPa and Pathcards, since enrichment  
466 analysis is performed prior to reduction of redundancy. This is because the  
467 different sets of pathway boundaries available in the full dataset may optimally fit  
468 the differentially expressed genes. For example, comparison of the 'apoptosis'  
469 taken from KEGG, Reactome and Wikipathways, reveals that many of the proteins  
470 are specific to a single database [22]. This is due to the vague definition of pathway  
471 boundaries, as well as differing experimental focus on cellular contexts, such as  
472 tissues or disease states. Following enrichment analysis the pathways that are  
473 most significantly enriched are selected to represent the differentially expressed

474 genes and superfluous pathways are removed. This prevents the top results from  
475 being dominated by large numbers of highly similar pathways.

476

477 Set cover uses greedy heuristic methods, which provide good approximations of  
478 the optimal solution in a time effective manner. These methods are extremely  
479 efficient and can be run in a matter of minutes, however it should be noted that  
480 they do not guarantee an optimal solution. This is particularly true for the  
481 proportional set cover algorithm where the randomness of early selections  
482 influences the result. However, all possible outcomes result in reduced  
483 redundancy. The enrichment set cover algorithm is exempt from these  
484 considerations unless multiple pathways have identical p-values.

485

486 We have provided a method to dramatically reduce redundancy in pathways  
487 facilitating a more concise portrayal of cellular processes, while avoiding the issues  
488 introduced by pathway merging. Our algorithms are publicly available and have  
489 wide applicability to analysis of pathway datasets from any organism.

490

## 491 7. List of abbreviations

492 CPDB Consensus PathwayDB

493 GC Gene cover

494 SNP Single nucleotide polymorphism

495

## 496 8. Declarations

497 Ethics approval and consent to participate NA

498 Consent for publication NA

499 Availability of data and materials: [https://github.com/RuthStoney/set-cover-and-](https://github.com/RuthStoney/set-cover-and-set-packing-to-reduce-redundancy-in-pathway-data)  
500 [set-packing-to-reduce-redundancy-in-pathway-data](https://github.com/RuthStoney/set-cover-and-set-packing-to-reduce-redundancy-in-pathway-data)

501 Competing interests: The authors declare that they have no competing interests

502 Funding: This work has been supported by the Biotechnology and Biological

503 Sciences Research Council DTP [BB/J014478/1].

504 Author contributions: All authors contributed to the design of the study. R.S.

505 performed the analysis and wrote the manuscript. All authors edited the

506 manuscript and approved its final version.

507

508 Acknowledgements: We would like to thank Jamie Soul and Sara Dunn from the  
509 University of Manchester, for providing the osteoarthritis data.

510

## 511 9. References

512 1. Kanehisa M, Goto S. KEGG: kyoto encyclopedia of genes and genomes. *Nucleic*  
513 *Acids Res.* 2000;28:27–30.



- 514 <http://www.pubmedcentral.nih.gov/articlerender.fcgi?artid=102409&tool=pmcentrez&rendertype=abstract>.  
515  
516 2. Fabregat A, Sidiropoulos K, Garapati P, Gillespie M, Hausmann K, Haw R, et al.  
517 The reactome pathway knowledgebase. *Nucleic Acids Res.* 2016;44:D481–7.  
518 3. Kamburov A, Pentchev K, Galicka H, Wierling C, Lehrach H, Herwig R.  
519 ConsensusPathDB : toward a more complete picture of cell biology. 2011;39  
520 November 2010:712–7.  
521 4. Kamburov A, Wierling C, Lehrach H, Herwig R. ConsensusPathDB--a database for  
522 integrating human functional interaction networks. *Nucleic Acids Res.* 2009;37  
523 Database issue:D623-8. doi:10.1093/nar/gkn698.  
524 5. Cerami EG, Gross BE, Demir E, Rodchenkov I. Pathway Commons , a web  
525 resource for biological pathway data. 2011;39 November 2010:685–90.  
526 6. Chowbina SR, Wu X, Zhang F, Li PM, Pandey R, Kasamsetty HN, et al. HPD: an  
527 online integrated human pathway database enabling systems biology studies. *BMC*  
528 *Bioinformatics.* 2009;14 Suppl 11:S5. doi:10.1186/1471-2105-10-S11-S5.  
529 7. Schaefer CF, Anthony K, Krupa S, Buchoff J, Day M, Hannay T, et al. PID: The  
530 pathway interaction database. *Nucleic Acids Res.* 2009;37 SUPPL. 1:674–9.  
531 8. Geer LY, Marchler-Bauer A, Geer RC, Han L, He J, He S, et al. The NCBI BioSystems  
532 database. *Nucleic Acids Res.* 2009;38 SUPPL.1:492–6.  
533 9. Doderer MS, Anguiano Z, Suresh U, Dashnamoorthy R, Bishop AJR, Chen Y.  
534 Pathway Distiller - multisource biological pathway consolidation. *BMC Genomics.*  
535 2012;13 Suppl 6 Suppl 6:S18. doi:10.1186/1471-2164-13-S6-S18.  
536 10. Vivar JC, Pemu P, McPherson R, Ghosh S. Redundancy control in pathway  
537 databases (ReCiPa): an application for improving gene-set enrichment analysis in  
538 Omics studies and “Big data” biology. *Omics.* 2013;17:414–22.  
539 doi:10.1089/omi.2012.0083.  
540 11. Belinky F, Nativ N, Stelzer G, Zimmerman S, Iny Stein T, Safran M, et al.  
541 PathCards: multi-source consolidation of human biological pathways. *Database.*  
542 2015;2015:bav006-bav006. doi:10.1093/database/bav006.  
543 12. Yu N, Seo J, Rho K, Jang Y, Park J, Kim WK, et al. hiPathDB: A human-integrated  
544 pathway database with facile visualization. *Nucleic Acids Res.* 2012;40:797–802.  
545 13. Alexa A, Rahnenführer J, Lengauer T. Improved scoring of functional groups  
546 from gene expression data by decorrelating GO graph structure. *Bioinformatics.*  
547 2006;22:1600–7.  
548 14. Camon E, Magrane M, Barrell D, Lee V, Dimmer E, Maslen J, et al. The Gene  
549 Ontology Annotation (GOA) Database: sharing knowledge in Uniprot with Gene  
550 Ontology. *Nucleic Acids Res.* 2004;32:D262–6.  
551 15. Dunn SL, Soul J, Anand S, Schwartz JM, Boot-Handford RP, Hardingham TE.  
552 Gene expression changes in damaged osteoarthritic cartilage identify a signature  
553 of non-chondrogenic and mechanical responses. *Osteoarthr Cartil.* 2016;24:1431–  
554 40. doi:10.1016/j.joca.2016.03.007.  
555 16. Song L, Florea L. CLASS: constrained transcript assembly of RNA-seq reads.  
556 *BMC Bioinformatics.* 2013;14 Suppl 5 Suppl 5:S14. doi:10.1186/1471-2105-14-S5-  
557 S14.  
558 17. Huang C, Morcos F, Kanaan SP, Wuchty S, Chen DZ. Predicting Protein-Protein  
559 Interactions from Protein Domains Using a Set Cover Approach. *Quality.*  
560 2007;4:78–87.  
561 18. Ao SI, Yip K, Ng M, Cheung D, Fong PY, Melhado I, et al. CLUSTAG: Hierarchical  
562 clustering and graph methods for selecting tag SNPs. *Bioinformatics.*

563 2005;21:1735–6.  
564 19. Borneman J, Chrobak M, Della Vedova G, Figueroa a, Jiang T. Probe selection  
565 algorithms with applications in the analysis of microbial communities.  
566 Bioinformatics. 2001;17 Suppl 1:S39-48.  
567 <http://www.ncbi.nlm.nih.gov/pubmed/11472991>.  
568 20. Kordalewski D. New Greedy Heuristics For Set Cover and Set Packing. 2013;  
569 April:49. <http://arxiv.org/abs/1305.3584>.  
570 21. Young MD, Wakefield MJ, Smyth GK, Oshlack A. Gene ontology analysis for  
571 RNA-seq: accounting for selection bias. Genome Biol. 2010;11:R14.  
572 doi:10.1186/gb-2010-11-2-r14.  
573 22. Herwig R, Hardt C, Lienhard M, Herwig R, Hardt C, Lienhard M, et al. Analyzing  
574 and interpreting genome data at the network level with ConsensusPathDB  
575 Analyzing and interpreting genome data at the network level with  
576 ConsensusPathDB. 2016; October.  
577  
578

## 579 10. Figure legends

580  
581 *Figure 1. Set cover A) A simple set of overlapping sets. B) The red set with 8*  
582 *uncovered elements is selected first. C) The blue set with 3 elements is selected*  
583 *second. D) The orange set then covers all the elements in the universe.*

584 *Figure 2. Jaccard coefficient between pathway pairs in the cover set results produced*  
585 *by each algorithm.*

586  
587 *Figure 3. Redundancy in set cover outputs given different GC values.*

588  
589 *Figure 4. Pathway sizes in cover set when GC is set to A) 100%, B) 99%, C) 95% and*  
590 *D) 90%. The boxes indicate the 25th and 75th percentiles and the whiskers indicate*  
591 *the 5th and 95th percentiles.*

592  
593 *Figure 5. Pathway redundancy heat maps. (A) Pathway overlap for top ten enriched*  
594 *pathways. (B) Pathway overlap for top ten enriched pathways after application of set*  
595 *cover. The values represent asymmetric overlap, i.e. for each pathway shown on the*  
596 *left axis, values represent the proportion of genes that are also included in the*  
597 *pathway shown on the bottom axis.*

598

## 599 11. Additional material

600 Supplementary table 1: Enriched pathways from the osteoarthritis dataset (p-  
601 value<0.05). The set cover column indicated the 23 pathways that were included  
602 in the set cover. Found in additional file 1.docx.

603

604



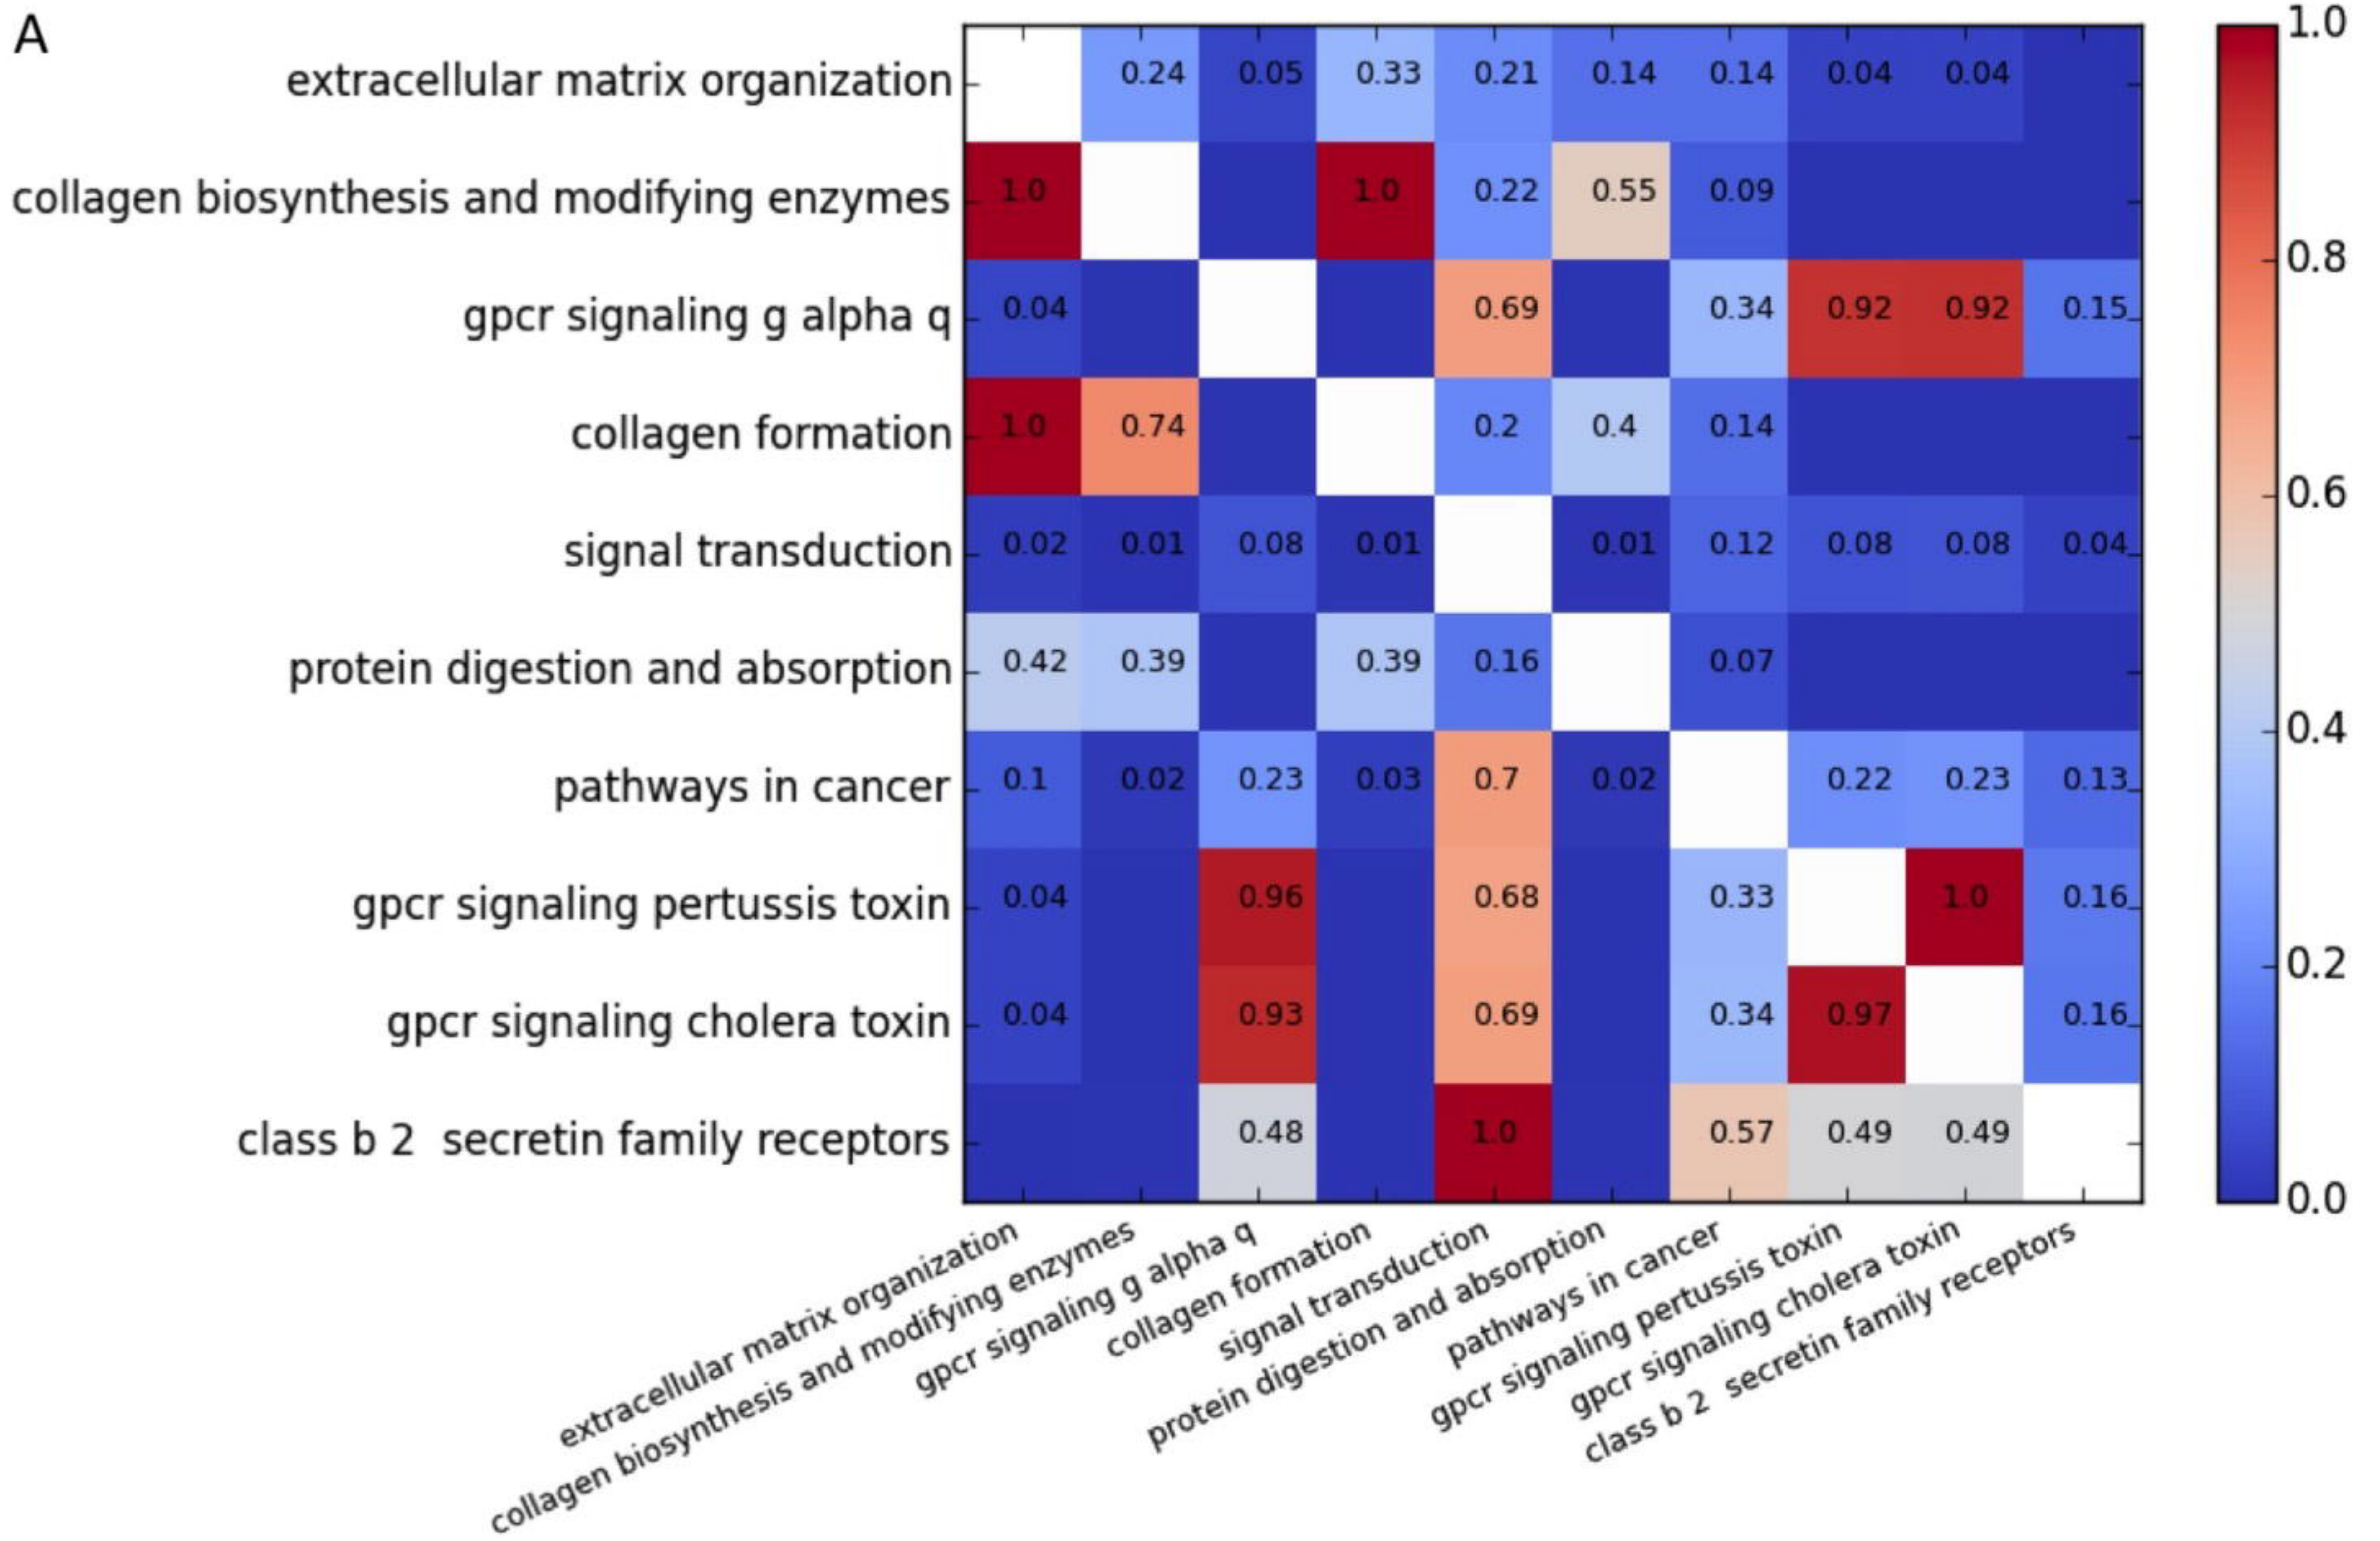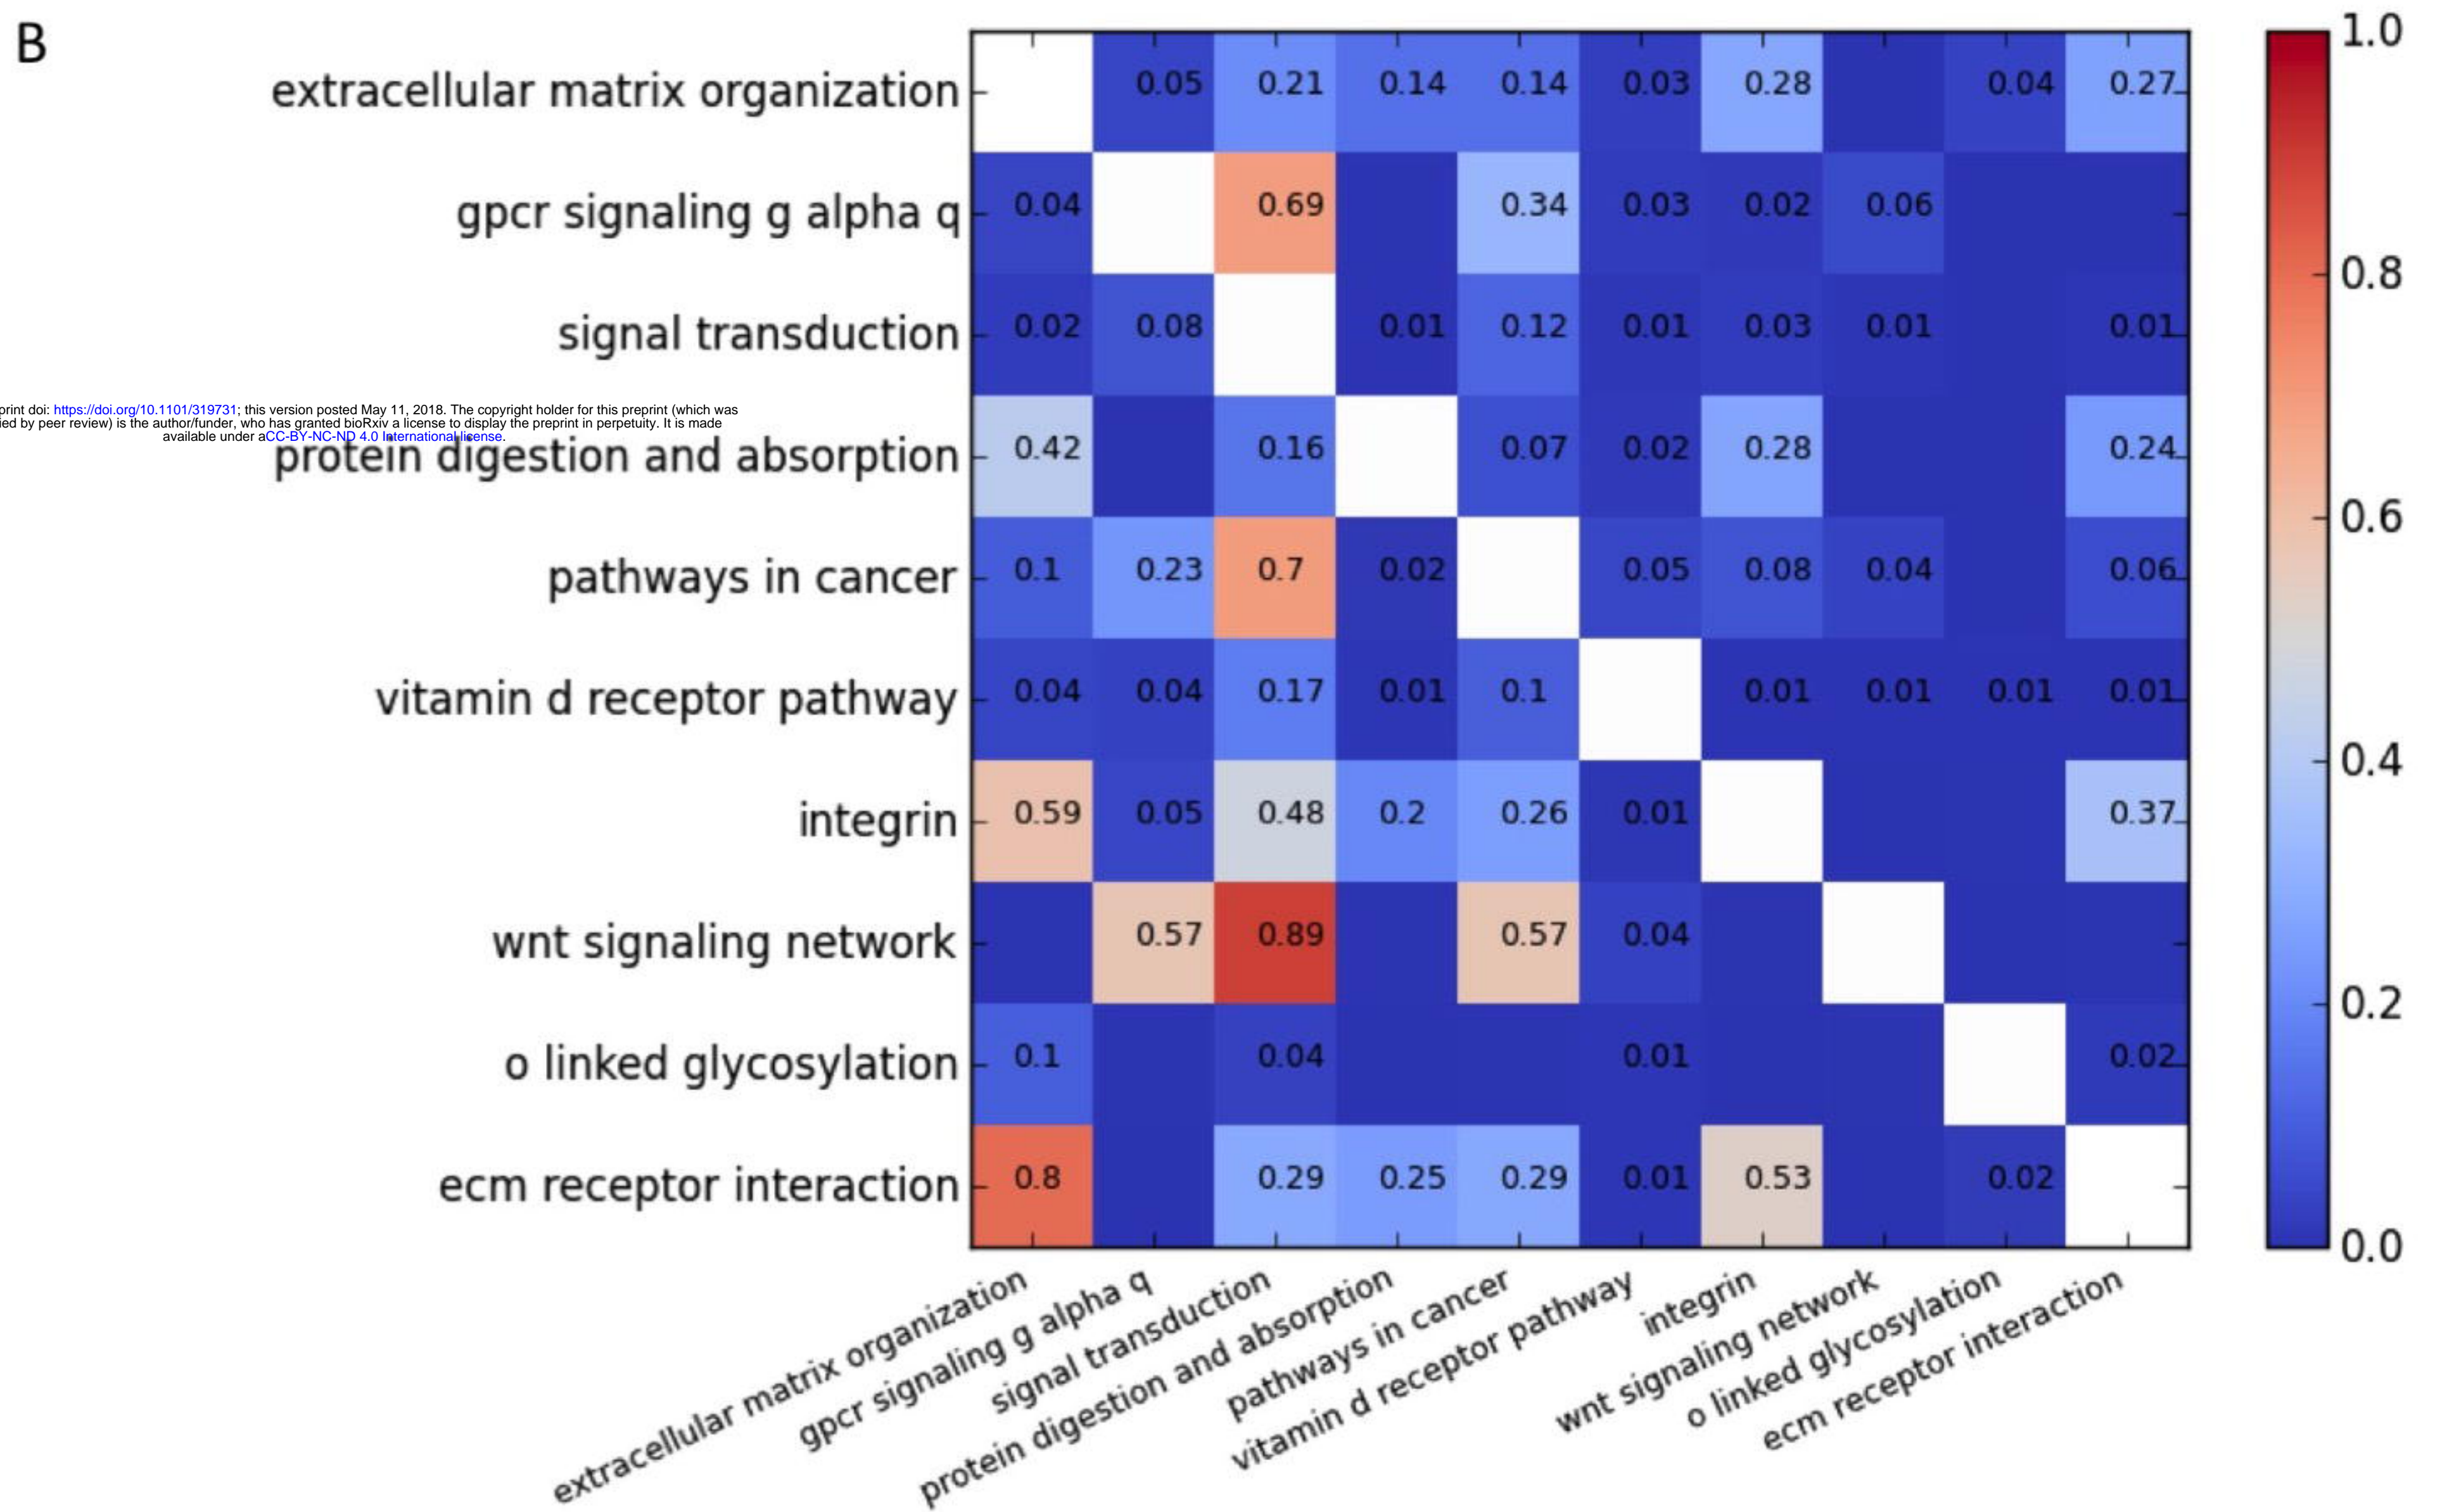



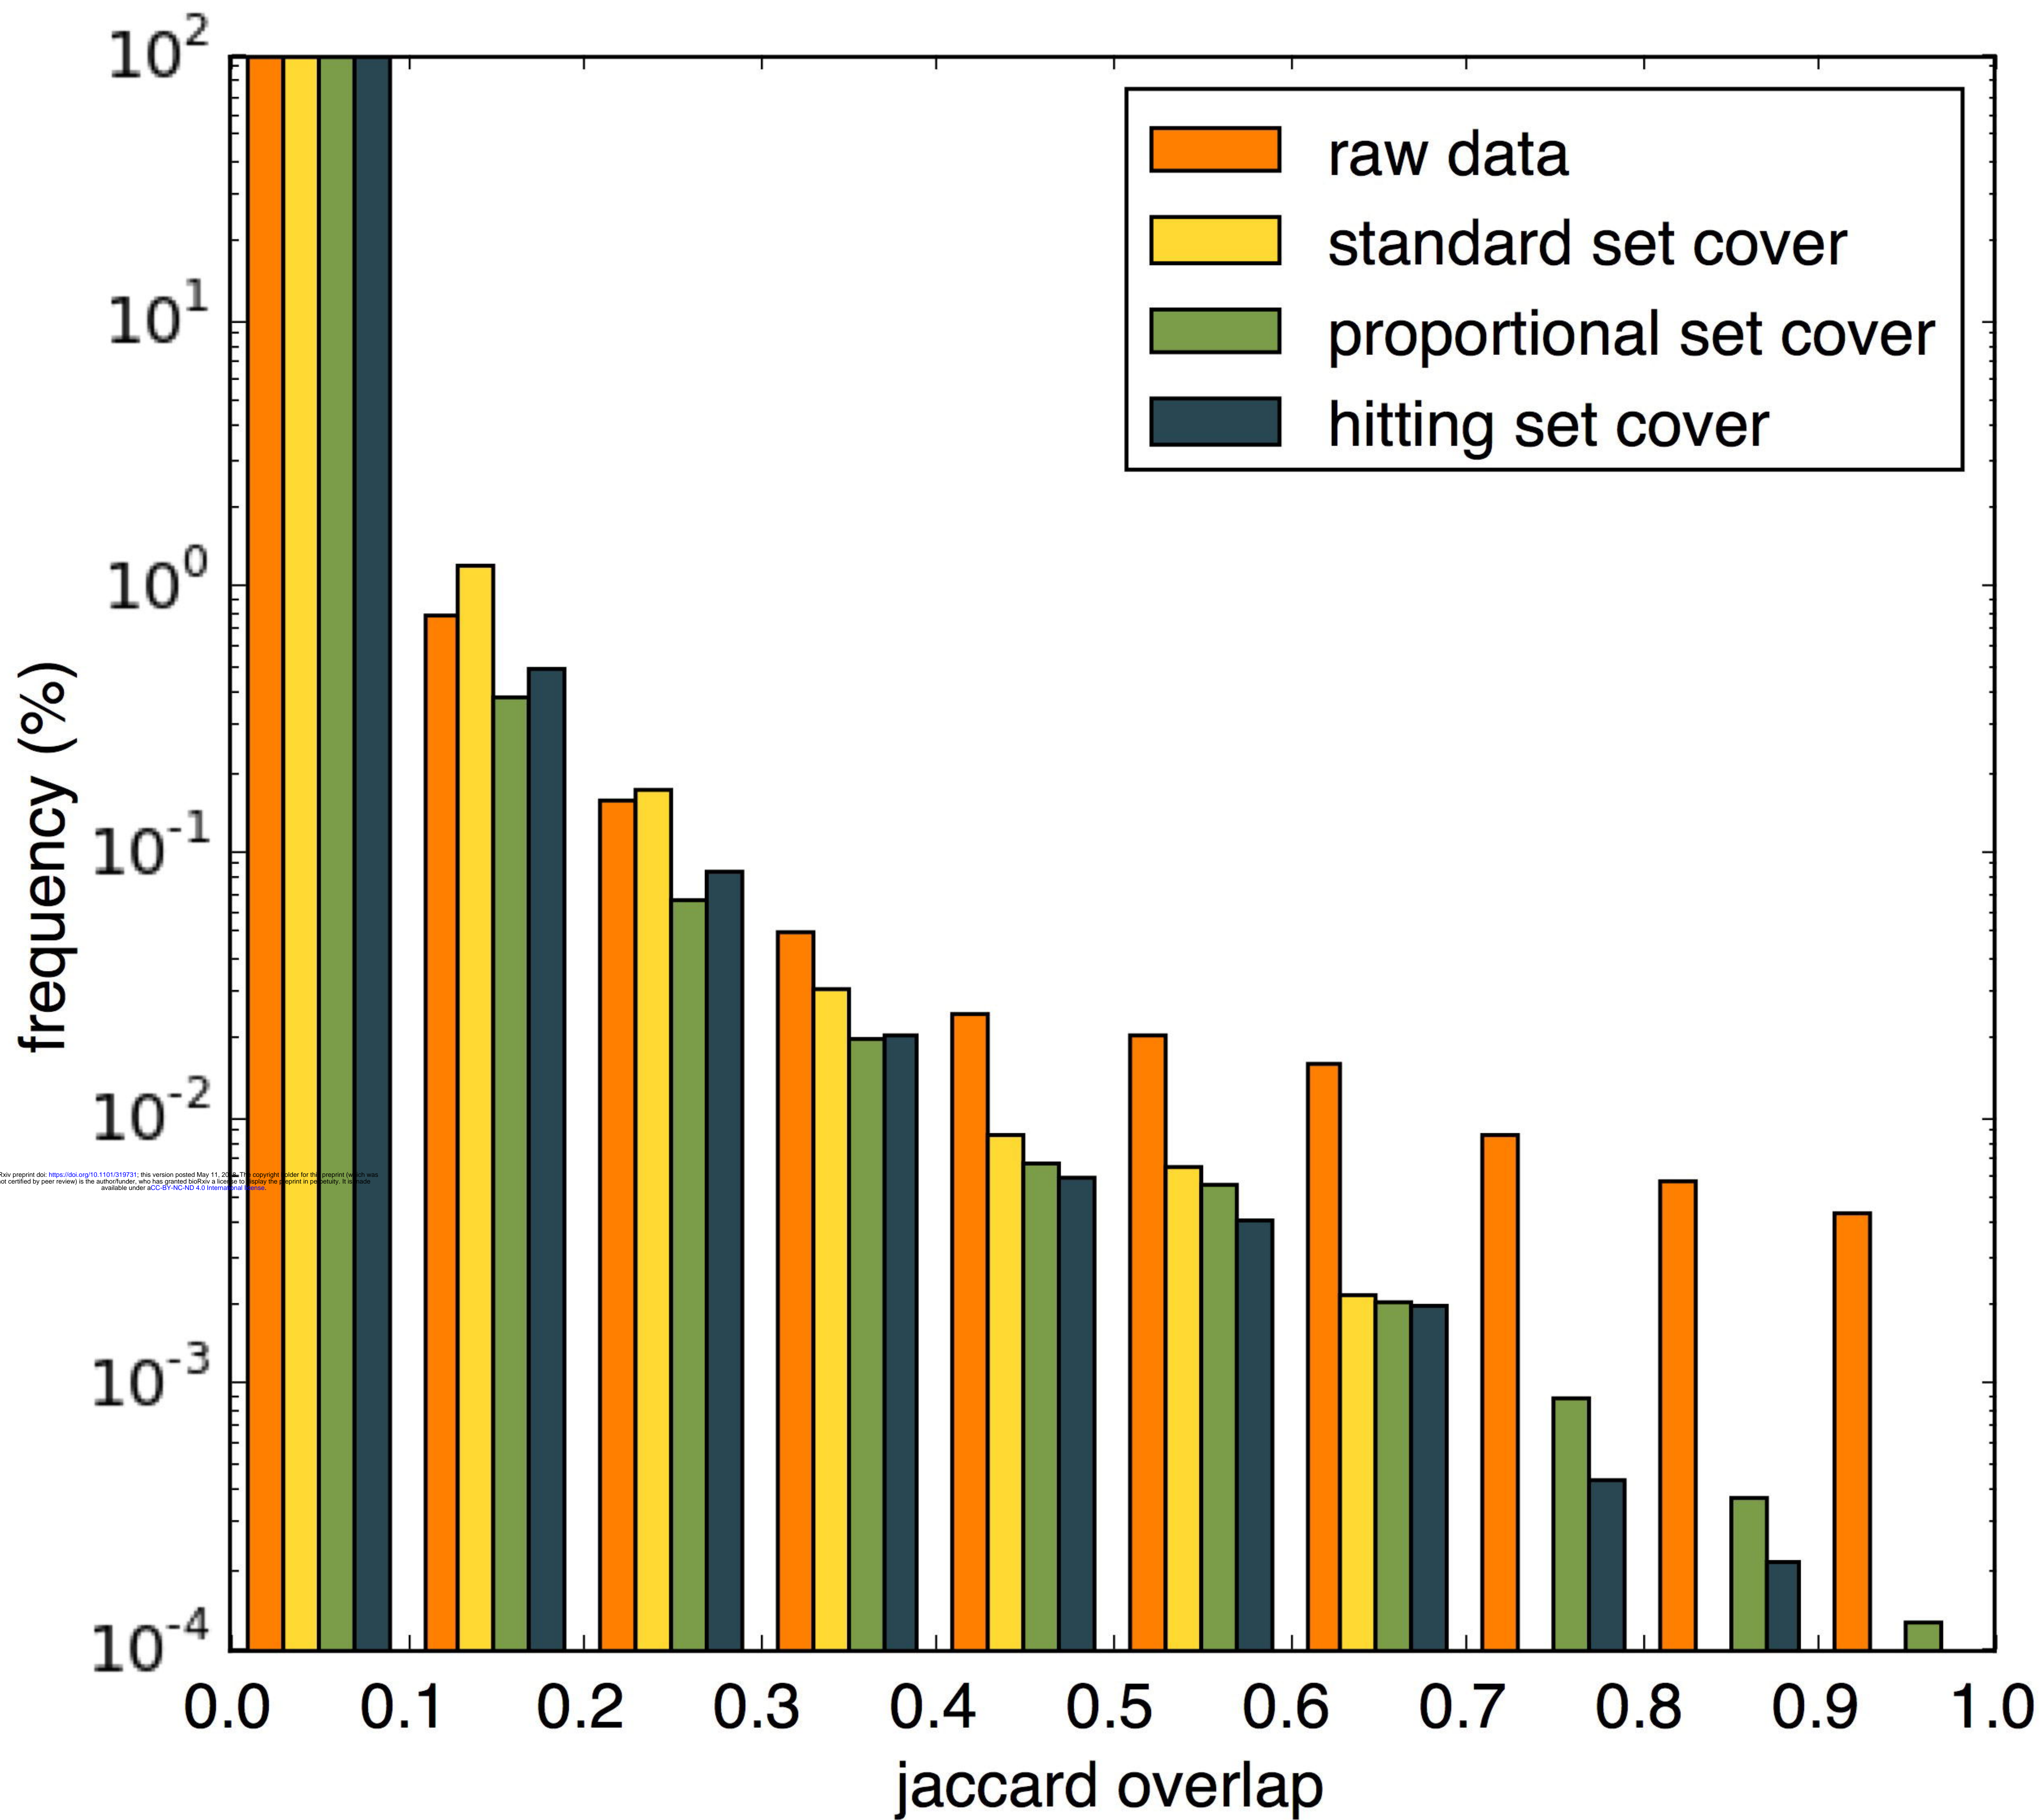



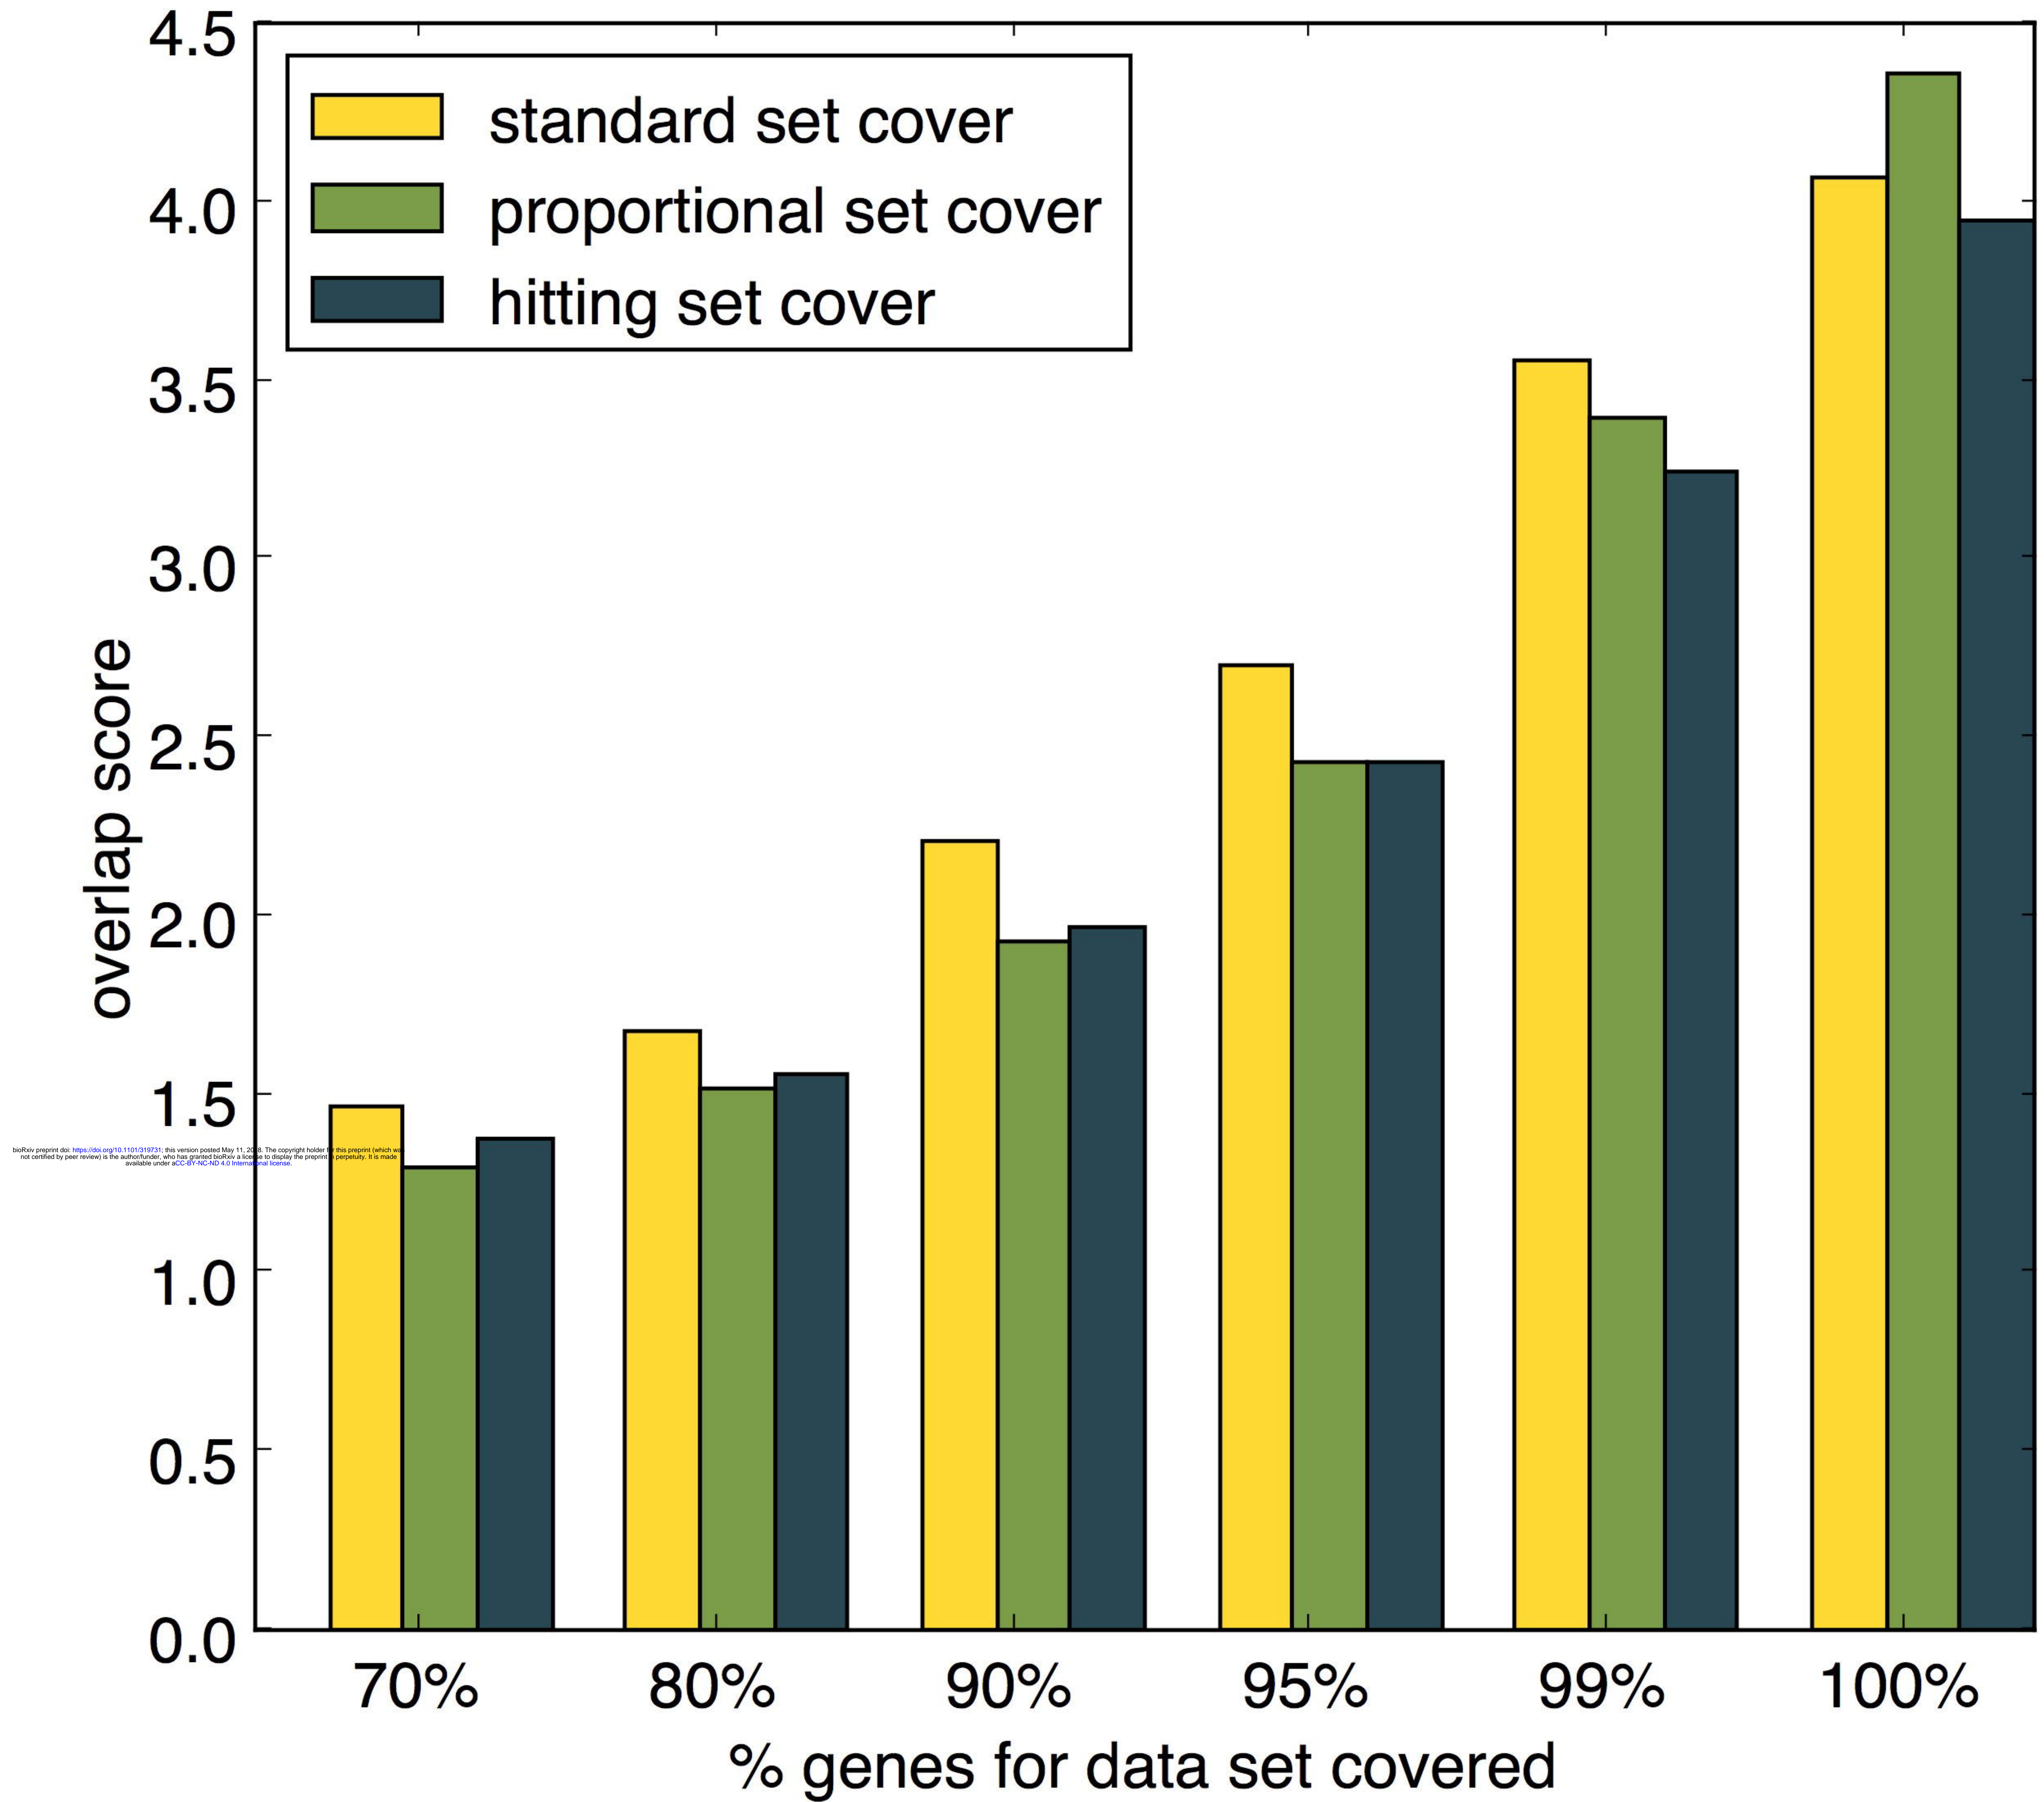

bioRxiv preprint doi: <https://doi.org/10.1101/319731>; this version posted May 11, 2018. The copyright holder for this preprint (which was not certified by peer review) is the author/funder, who has granted bioRxiv a license to display the preprint in perpetuity. It is made available under aCC-BY-NC-ND 4.0 International license.



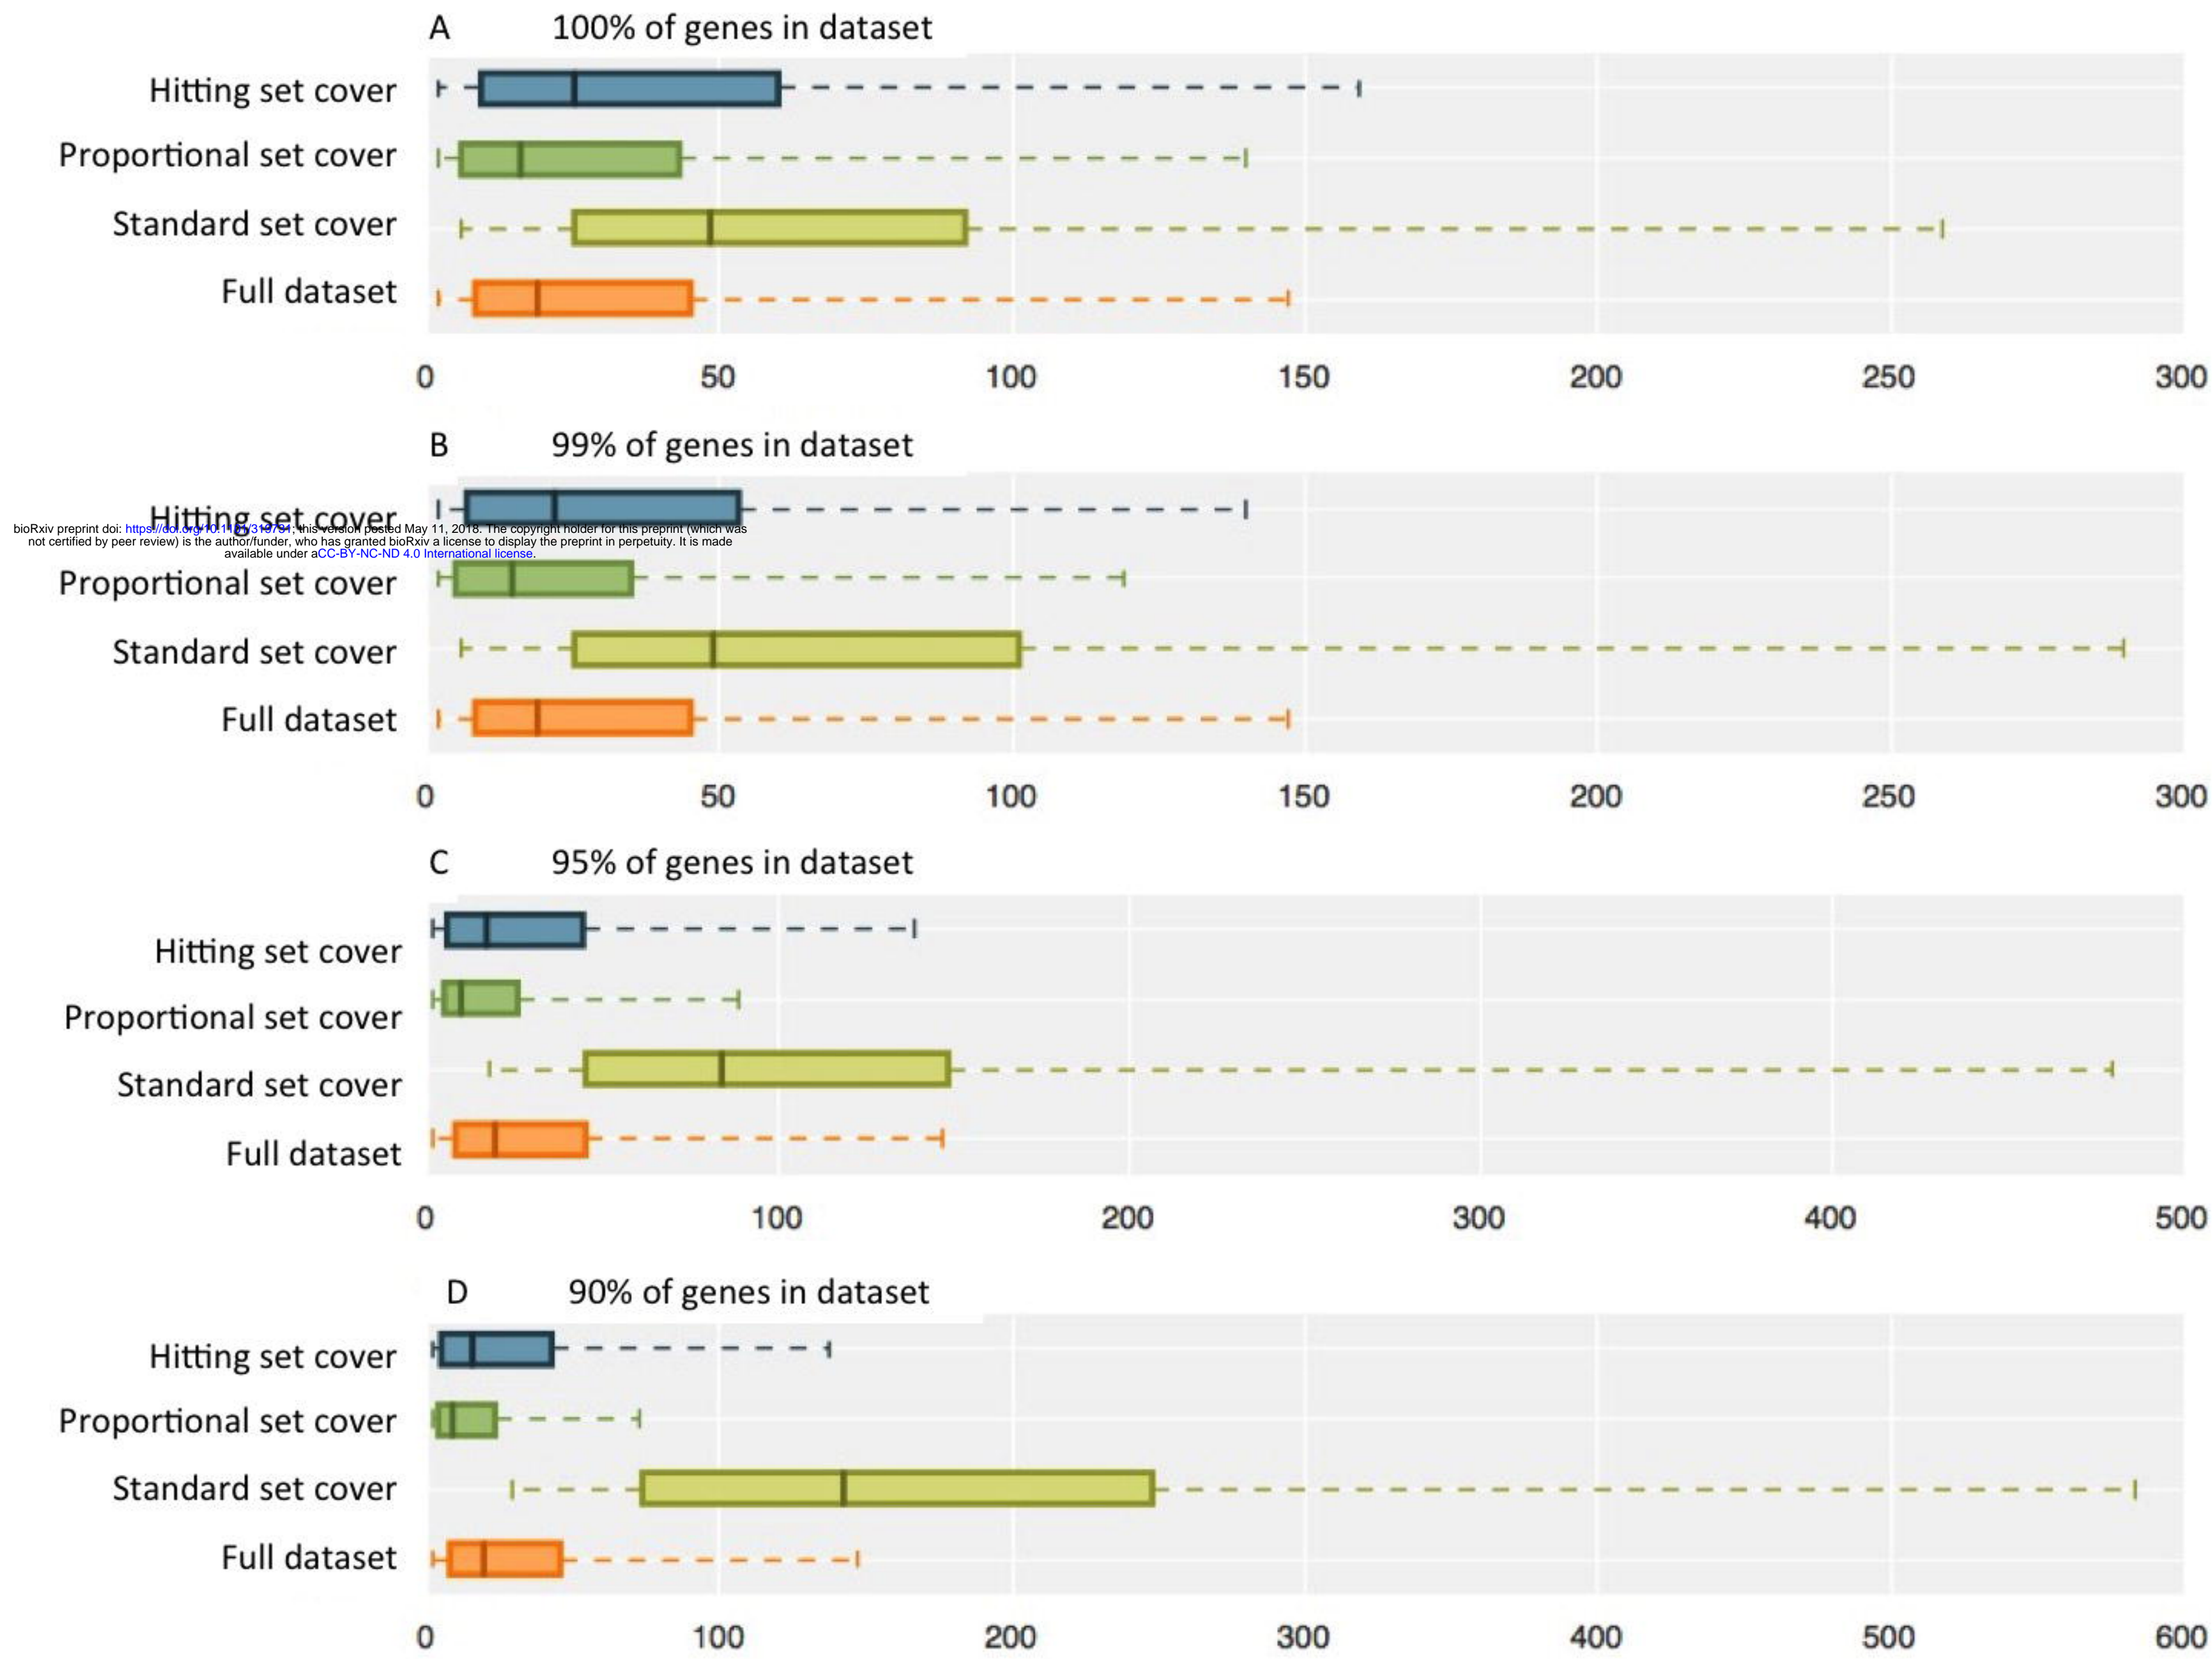

# Set cover

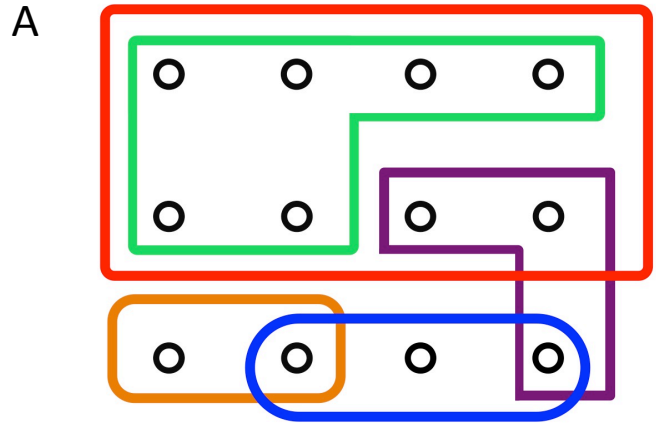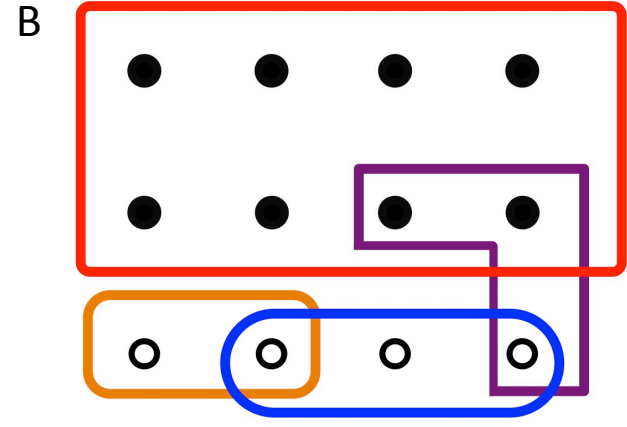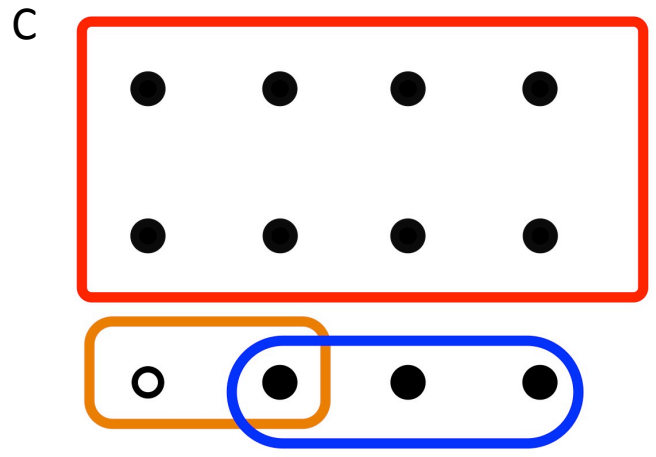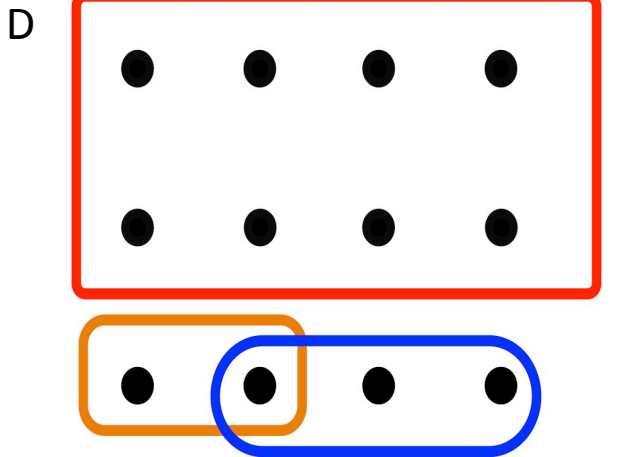

## Set Cover

Start with  $\mathbf{R} = \mathbf{U}$ ,  $\mathbf{C} = \emptyset$  and  $\mathbf{SC} = \emptyset$

**while**  $|\mathbf{C}|/|\mathbf{U}| * 100 < GC$  **do**

*Select set  $s_i$  that maximizes  $v_i$*

*Add  $s_i$  to  $\mathbf{SC}$*

*Add the elements in  $s_i$  to  $\mathbf{C}$*

*Delete the elements in  $s_i$  from  $\mathbf{R}$*

**end**

*Return  $\mathbf{SC}$*
